# Supplementary material
Source: HighWire-hosted journal article supplement (https://bmjopen.bmj.com/content/12/2/e051700)
Supplement: inline-supplementary-material-1 [file inline-supplementary-material-1.pdf]

1 **SUPPLEMENTARY MATERIAL**

2

3 **The experiences and wellbeing of healthcare professionals working in the field of**  
4 **ultrasound in Obstetrics and Gynaecology as the SARS-CoV-2 pandemic was evolving: a**  
5 **cross-sectional survey study**

6

7 **Authors**

8 Tom Bourne<sup>1,2</sup>, Christopher Kyriacou<sup>1</sup>, Harsha Shah<sup>1</sup>, Jolien Ceusters<sup>3</sup>, Jessica Preisler<sup>4,5</sup>,  
9 Ulrike Metzger<sup>6</sup>, Chiara Landolfo<sup>7</sup>, Christoph Lees<sup>8</sup>, Dirk Timmerman<sup>2,9</sup>

10

11

12 **Affiliations**

13 1. Early pregnancy and Acute Gynaecology Unit, Department of Obstetrics and Gynaecology, Queen Charlotte's  
14 and Chelsea Hospital, Imperial College, London, UK.

15 2. Department of Development and Regeneration, KU Leuven, Leuven, Belgium.

16 3. Department of Oncology, Laboratory of Tumour Immunology and Immunotherapy, KU Leuven, Leuven,  
17 Belgium.

18 4. Facultad de Medicina, Clínica Alemana – Universidad del Desarrollo, Santiago, Chile

19 5. Hospital Clínico de la Universidad de Chile, Santiago, Chile.

20 6. Centre d'Échographie de l'Odéon, Paris, France.

21 7. Dipartimento Scienze della Salute della Donna, del Bambino e di Sanità Pubblica, Fondazione Policlinico  
22 Universitario Agostino Gemelli, IRCCS, Rome, Italy.

23 8. Centre for Fetal Care, Department of Obstetrics and Gynaecology, Queen Charlotte's and Chelsea Hospital,  
24 Imperial College, London, UK.

25 9. Department of Obstetrics and Gynaecology, University Hospitals Leuven, Leuven, Belgium.

26

27 **Correspondence to:**

28 Professor Tom Bourne

29 Queen Charlotte's and Chelsea Hospital, Imperial College London

30 Du Cane Road, London, W12 0HS, UK

31 [t.bourne@imperial.ac.uk](mailto:t.bourne@imperial.ac.uk)

32

33

34

35

1 **Supplement 1: The International Society of Ultrasound in Obstetrics and Gynecology**  
2 **(ISUOG) SARS-CoV-2 Questionnaire for healthcare professionals working with ultrasound**  
3 **in Obstetrics and Gynecology.**

4  
5 **Informed consent**

6  
7 This questionnaire is fully anonymous - answers cannot be traced back to participants.  
8 The anonymised data will be collected for analysis in order to provide a report and  
9 publication at a later date.

10  
11 **1. Please click 'yes' to participate in this survey. Otherwise, click 'no': (please choose**  
12 **one option)**

13 Yes

14 No

15  
16 **Introduction**

17  
18 **2. What title best describes your job: (please choose one option)**

19 Sonographer – Obstetrics

20 Sonographer – Gynecology

21 Sonographer – Obstetrics and Gynecology

22 Obstetrician

23 Gynecologist

24 Obstetrician and Gynecologist

25 Radiologist

26 Doctor in training – Obstetrics

27 Doctor in training – Gynecology

28 Doctor in training – Obstetrics and Gynecology

29 Doctor in training – Radiologist

30 Doctor in research – Obstetrics

31 Doctor in research – Gynecology

32 Doctor in research – Obstetrics and Gynecology

33 Doctor in research – Radiology

34 Nurse – Obstetrics

35 Nurse – Gynecology

36 Nurse – Obstetrics and Gynecology

37 Nurse – Early pregnancy only

38 Midwife – Obstetrics

39 Midwife – Early pregnancy only

40 Retired

41  
42 **3. In what country do you practice? (please state below)**

43 Afghanistan

44 Albania

45 Algeria

46 Andorra

47 Angola

- 1 Antigua and Barbuda
- 2 Argentina
- 3 Armenia
- 4 Australia
- 5 Austria
- 6 Azerbaijan
- 7 The Bahamas
- 8 Bahrain
- 9 Bangladesh
- 10 Barbados
- 11 Belarus
- 12 Belgium
- 13 Belize
- 14 Benin
- 15 Bhutan
- 16 Bolivia
- 17 Bosnia and Herzegovina
- 18 Botswana
- 19 Brazil
- 20 Brunei
- 21 Bulgaria
- 22 Burkina Faso
- 23 Burundi
- 24 Cabo Verde
- 25 Cambodia
- 26 Cameroon
- 27 Canada
- 28 Central African Republic
- 29 Chad
- 30 Chile
- 31 China
- 32 Colombia
- 33 Comoros
- 34 Congo, Democratic Republic of the
- 35 Congo, Republic of the
- 36 Costa Rica
- 37 Côte d'Ivoire
- 38 Croatia
- 39 Cuba
- 40 Cyprus
- 41 Czech Republic
- 42 Denmark
- 43 Djibouti
- 44 Dominica
- 45 Dominican Republic
- 46 East Timor (Timor-Leste)
- 47 Ecuador

- 1 Egypt
- 2 El Salvador
- 3 Equatorial Guinea
- 4 Eritrea
- 5 Estonia
- 6 Eswatini
- 7 Ethiopia
- 8 Fiji
- 9 Finland
- 10 France
- 11 Gabon
- 12 The Gambia
- 13 Georgia
- 14 Germany
- 15 Ghana
- 16 Greece
- 17 Grenada
- 18 Guatemala
- 19 Guinea
- 20 Guinea-Bissau
- 21 Guyana
- 22 Haiti
- 23 Honduras
- 24 Hungary
- 25 Iceland
- 26 India
- 27 Indonesia
- 28 Iran
- 29 Iraq
- 30 Ireland
- 31 Israel
- 32 Italy
- 33 Jamaica
- 34 Japan
- 35 Jordan
- 36 Kazakhstan
- 37 Kenya
- 38 Kiribati
- 39 Korea, North
- 40 Korea, South
- 41 Kosovo
- 42 Kuwait
- 43 Kyrgyzstan
- 44 Laos
- 45 Latvia
- 46 Lebanon
- 47 Lesotho

- 1 Liberia
- 2 Libya
- 3 Liechtenstein
- 4 Lithuania
- 5 Luxembourg
- 6 Madagascar
- 7 Malawi
- 8 Malaysia
- 9 Maldives
- 10 Mali
- 11 Malta
- 12 Marshall Islands
- 13 Mauritania
- 14 Mauritius
- 15 Mexico
- 16 Micronesia, Federated States of
- 17 Moldova
- 18 Monaco
- 19 Mongolia
- 20 Montenegro
- 21 Morocco
- 22 Mozambique
- 23 Myanmar (Burma)
- 24 Namibia
- 25 Nauru
- 26 Nepal
- 27 Netherlands
- 28 New Zealand
- 29 Nicaragua
- 30 Niger
- 31 Nigeria
- 32 North Macedonia
- 33 Norway
- 34 Oman
- 35 Pakistan
- 36 Palau
- 37 Panama
- 38 Papua New Guinea
- 39 Paraguay
- 40 Peru
- 41 Philippines
- 42 Poland
- 43 Portugal
- 44 Qatar
- 45 Romania
- 46 Russia
- 47 Rwanda

- 1 Saint Kitts and Nevis
- 2 Saint Lucia
- 3 Saint Vincent and the Grenadines
- 4 Samoa
- 5 San Marino
- 6 Sao Tome and Principe
- 7 Saudi Arabia
- 8 Senegal
- 9 Serbia
- 10 Seychelles
- 11 Sierra Leone
- 12 Singapore
- 13 Slovakia
- 14 Slovenia
- 15 Solomon Islands
- 16 Somalia
- 17 South Africa
- 18 Spain
- 19 Sri Lanka
- 20 Sudan
- 21 Sudan, South
- 22 Suriname
- 23 Sweden
- 24 Switzerland
- 25 Syria
- 26 Taiwan
- 27 Tajikistan
- 28 Tanzania
- 29 Thailand
- 30 Togo
- 31 Tonga
- 32 Trinidad and Tobago
- 33 Tunisia
- 34 Turkey
- 35 Turkmenistan
- 36 Tuvalu
- 37 Uganda
- 38 Ukraine
- 39 United Arab Emirates
- 40 United Kingdom
- 41 United States
- 42 Uruguay
- 43 Uzbekistan
- 44 Vanuatu
- 45 Vatican City
- 46 Venezuela
- 47 Vietnam

1 Yemen  
2 Zambia  
3 Zimbabwe

4

5 **4. Are you an ISUOG member? (please choose one option)**

6 Yes

7 No

8

9 **5. If you answered no, which society or professional body did you receive this survey**  
10 **from?**

11 Open box answer

12

13 **Demographics**

14

15 **6. How old are you? (please state number of years)**

16 Numbers offered

17

18 **7. What sex were you assigned at birth? (please choose one option)**

19 Male

20 Female

21 Intersex

22 Prefer not to say

23

24 **8. What gender do you most identify with? (please choose one option)**

25 Male

26 Female

27 Prefer not to say

28 Other (please specify)

29

30

31 **Underlying medical conditions**

32

33 **9. Do you have any underlying medical conditions that place you at increased risk**  
34 **during the SARS-CoV-2 pandemic? (please tick all that apply)**

35 None

36 Heart disease

37 Hypertension

38 Diabetes

39 Asthma

40 Other lung disease

41 Kidney disease

42 Cancer

43

44

45

46

47

1

2 **Medication**

3

4 **10. Are you taking any of the following medications? (please tick all that apply)**

5 None

6 Immunosuppressant medication - steroids

7 Immunosuppressant medication - methotrexate

8 Immunosuppressant medication - biological agents

9 Aspirin

10 Indomethacin

11 Any other non-steroidal anti-inflammatory drugs (NSAIDS) e.g. ibuprofen, diclofenac,  
12 naproxen13 Angiotensin converting enzyme inhibitors (ACEi) blood pressure medication - any ending in -  
14 pril (e.g. enalapril)15 Any other blood pressure medication e.g. angiotensin receptor blockers (ARB), alpha  
16 blockers, alpha-2 receptor agonists, beta blockers, combined alpha and beta blockers,  
17 calcium channel blockers (CCB), diuretics, other

18

19

20 **Smoking and BMI**

21

22 **11. Do you smoke? (please choose one option)**

23 Yes

24 Previously – now stopped

25 No

26

27 **12. What was your last measured weight? (please choose one option)**28 *In kilograms (kg) – numbers offered*

29

30 **13. What is your height? (please choose one option)**31 *In centimetres (cm) – numbers offered*

32

33 **Role, shift pattern, PPE**

34

35 **14. How has your role and shift pattern been affected by the SARS-CoV-2 pandemic?  
36 (please choose one option)**

37 Unable to work for the duration of the pandemic

38 Reduced duties with no patient contact

39 Reduced duties with reduced patient contact

40 Reduced duties with similar patient contact

41 Reduced duties with increased patient contact

42 Similar duties with no patient contact

43 Similar duties with reduced patient contact

44 Similar duties with similar patient contact

45 Similar duties with increased patient contact

46 Increased duties with no patient contact

47 Increased duties with reduced patient contact



- 1 Increased duties with similar patient contact  
2 Increased duties with increased patient contact  
3  
4 **15. Where are you working during the SARS-CoV-2 pandemic? (please tick all that  
5 apply)**  
6 Obstetrics – Labor ward  
7 Obstetrics – Birth center  
8 Obstetrics – Antenatal ward  
9 Obstetrics – Postnatal ward  
10 Obstetrics – Maternity triage  
11 Obstetrics – Antenatal clinic  
12 Obstetrics – Maternity helplines  
13 Obstetrics – Community clinics  
14 Obstetrics – Ultrasound  
15 Gynecology – Acute gynecology  
16 Gynecology – Benign gynecology  
17 Gynecology – Oncology  
18 Gynecology – Ultrasound  
19 Early pregnancy unit – Ultrasound and assessment  
20 Radiology – Ultrasound  
21 Radiology – non-ultrasound  
22 Obstetrics/Gynecology/Radiology – From home  
23  
24 **16. Do you interact with patients confirmed or suspected to have SARS-CoV-2? (please  
25 choose one option)**  
26 Yes – every day  
27 Yes – every week  
28 Yes – every so often  
29 I don't know  
30 Not yet  
31 No  
32  
33 **17. Have you been using personal protective equipment (PPE) since the SARS-CoV-2  
34 outbreak? (please choose one option)**  
35 No  
36 Not yet  
37 Yes – for aerosol generating procedures only  
38 Yes – for suspected/positive patients only  
39 Yes – for all patients  
40  
41 **18. When you perform an ultrasound scan please state what PPE you use: (please tick  
42 all that apply)**  
43 None  
44 Gloves  
45 Surgical mask  
46 N95/FFP3 mask  
47 Gown

- 1 Visor  
2 Surgical hat  
3  
4 **19. Have there been any concerns regarding PPE provision or shortages since the**  
5 **SARS-CoV-2 outbreak? (note – Full PPE includes a N95/FFP3 mask, visor, surgical**  
6 **hat, gown and gloves) (please tick all that apply)**  
7 No issues with provision  
8 Yes – supply issues with gloves  
9 Yes – supply issues with surgical masks  
10 Yes – supply issues with N95/FFP3 masks  
11 Yes – supply issues with gowns  
12 Yes – supply issues with visors  
13 Yes – supply issues with surgical hats  
14 Yes – supply issues with providing patients with a surgical mask  
15  
16 **20. Have you been asked to re-use or recycle any PPE? (please tick all that apply**  
17 **option)**  
18 No  
19 Yes - Gloves  
20 Yes - Surgical mask  
21 Yes - N95/FFP3 mask  
22 Yes - Gown  
23 Yes - Visor  
24 Yes - Surgical hat  
25  
26 **21. Do you ask patients to wear a surgical mask? (please choose one option)**  
27 Yes  
28 No  
29  
30  
31 **SARS-CoV-2 diagnosis**  
32  
33 **22. Have you had or do you have SARS-CoV-2 based on clinical symptoms and/or a**  
34 **SARS-CoV-2 swab (PCR) diagnosis? (please choose one option)**  
35 No – no test or symptoms suggestive of SARS-CoV-2  
36 Yes – suspected based on symptoms but have not had PCR swab testing  
37 Yes – suspected based on symptoms, had PCR testing, which was negative  
38 Yes – confirmed on PCR swab testing but have had no symptoms  
39 Yes – suspected based on symptoms and confirmed on PCR swab testing  
40  
41 **23. With regards to having a SARS-CoV-2 swab test, please choose one option:**  
42 Not been offered  
43 Offered as experiencing symptoms  
44 Offered as in contact with confirmed or probable SARS-CoV-2 patients  
45 Offered as living with someone who has probable or confirmed SARS-CoV-2  
46 Not applicable  
47

1           **24. What symptoms have you experienced or are you experiencing? (please tick all**  
2           **that apply)**

- 3 None  
4 High fever  
5 Persistent dry cough  
6 Productive cough  
7 Shortness of breath/Difficulty breathing  
8 Fatigue  
9 Headache  
10 Loss of sense of smell and/or taste  
11 Sore throat  
12 Chest pain  
13 Diarrhoea  
14 Myalgia  
15 Loss of appetite  
16 Hoarse voice  
17 Abdominal pain

18  
19 **Personal SARS-CoV-2 pathway**

20  
21           **25. At what point were you offered a SARS-CoV-2 swab? (please state number of days**  
22           **into your illness with day 1 being the day you started to have symptoms. If you**  
23           **have not had symptoms – please choose 'not had symptoms'. If you were not**  
24           **offered a test, please choose 'not offered a test')**

- 25 Not had symptoms  
26 Not offered a test  
27 Not applicable  
28 Numbers offered

29  
30           **26. How severe was/is your infection? (please choose one option)**

- 31 Mild COVID-19 (T< 37.8 oC, tiredness, muscle aches, headache, no breathlessness, normal  
32 appetite)  
33 Moderate COVID-19 (T> 37.8 oC, troublesome cough, breathless on exercise, tired but no  
34 chest or abdominal pain)  
35 Severe COVID-19 (T> 37.8 oC, noticeably breathless even when sitting still, unable to  
36 complete sentences when talking, chest or abdominal pain, reduced appetite)  
37 Critical COVID-19 (development of severe acute respiratory syndrome in need of ventilator  
38 or other respiratory support)  
39 Not applicable

40  
41           **27. How long were you or have you been symptomatic for? (please state number of**  
42           **days. If you have not had symptoms – please choose 'not had symptoms')**

- 43 Not had symptoms  
44 Numbers offered

45

- 1           **28. How long did you stay at home before going back to work, or if current infection,**  
2           **how long have you been at home for? (please state number of days. If you have**  
3           **not had symptoms – please choose 'not had symptoms')**  
4       Not had symptoms  
5       Numbers offered  
6  
7           **29. Did you or do you feel under pressure from your employers to return to work**  
8           **before making a full recovery? (please choose one option)**  
9       Yes  
10       No  
11       Not applicable  
12  
13           **30. If you have been unwell with presumed or confirmed SARS-CoV-2, how long were**  
14           **you advised to stay at home by your employers before going back to work? (please**  
15           **state number of days. If you have not had symptoms – please choose 'not had**  
16           **symptoms')**  
17       Not had symptoms  
18       Numbers offered  
19  
20           **31. Have you had a SARS-CoV-2 antibody test? (please choose one option)**  
21       No – no test or symptoms suggestive of SARS-CoV-2  
22       No – not offered  
23       No – offered and declined  
24       Yes – negative  
25       Yes – positive  
26  
27  
28       **Household**  
29  
30           **32. Have you needed to, or are you currently self-isolating due to a member of your**  
31           **household having suspected or confirmed SARS-CoV-2? (please choose one option)**  
32       Yes  
33       No  
34  
35           **33. How long did you need or have you needed to self-isolate due to a member of your**  
36           **household having suspected or confirmed SARS-CoV-2? (please state number of**  
37           **days. If your household has been well - please choose 'household has been well')**  
38       Household has been well  
39       Numbers offered  
40  
41  
42  
43  
44  
45  
46  
47

1 **Colleagues**

2

3 **34. How many colleagues do you work with in your unit? (please state number of each**  
4 **group. Select 'unsure' if you do not know)**

5 *Sonographers*

6 *Consultants*

7 *Doctors in training*

8 *Doctors in research*

9 *Nurses*

10 *Midwives*

11 *Unsure*

12 *Numbers offered*

13

14 **35. To your knowledge, how many colleagues are you aware of in your unit that have**  
15 **had a presumed diagnosis of SARS-CoV-2 based on symptoms or a positive swab?**  
16 **(please state number of each group. Select 'unsure' if you have no information)**

17 *Sonographers*

18 *Consultants*

19 *Doctors in training*

20 *Doctors in research*

21 *Nurses*

22 *Midwives*

23 *Unsure*

24 *Numbers offered*

25

26 **36. To your knowledge, how many colleagues have needed to self-isolate or are self-**  
27 **isolating due to a member of their household having suspected or confirmed SARS-**  
28 **CoV-2? (please state number of each group. Select 'unsure' if you have no**  
29 **information)**

30 *Sonographers*

31 *Consultants*

32 *Doctors in training*

33 *Doctors in research*

34 *Nurses*

35 *Midwives*

36 *Unsure*

37 *Numbers offered*

38

39 **37. What is the longest period of time any of your colleagues have taken off in**  
40 **isolation because they or a household member have suspected or confirmed SARS-**  
41 **CoV-2? (please state number of days. Select 'unsure' if you have no information)**

42 *Unsure*

43 *Numbers offered*

44

45

46

47

1 **Support**

2  
3 **38. Have you felt or do you feel adequately supported by your unit during the SARS-**  
4 **CoV-2 pandemic? (please choose one option)**

5 Yes

6 No

7  
8 **39. How do you rate the response and support that was provided by your country's**  
9 **Ministry of Health or Public Health officials? (please answer using the scale below)**

10 0 - Extremely poor

11 50 - Adequate

12 100 - Excellent

13  
14  
15 **40. Please tell us, if you wish, your views regarding how well clinician safety has been**  
16 **protected by your employers (please state in the text box below. If you choose not**  
17 **to answer, please write 'not applicable')**

18 Open box answer

19  
20  
21 **Hospital Anxiety and Depression Scale (HADS)**

22  
23 **41. Thank you for filling out this questionnaire.**

24  
25 **Optional: Hospital Anxiety and Depression Scale (HADS). If you are willing to**  
26 **proceed, please click yes. Otherwise, click no to end the survey.**

27 Yes

28 No

29  
30  
31 **Hospital Anxiety and Depression Scale (HADS)**

32  
33 **42. Choose the reply that is closest to how you have been feeling in the past week.**  
34 **Don't take too long over your replies: your immediate is best.**

35  
36 **I feel tense or 'wound up':**

37 Most of the time

38 A lot of the time

39 From time to time, occasionally

40 Not at all

41  
42 **43. Choose the reply that is closest to how you have been feeling in the past week.**  
43 **Don't take too long over your replies: your immediate is best.**

44  
45 **I still enjoy the things I used to enjoy:**

46 Definitely as much

47 Not quite as much

- 1 Only a little  
2 Hardly at all  
3  
4 **44. Choose the reply that is closest to how you have been feeling in the past week.**  
5 **Don't take too long over your replies: your immediate is best.**  
6  
7 **I get a sort of frightened feeling as if something awful is about to happen:**  
8 Very definitely and quite badly  
9 Yes, but not too badly  
10 A little, but it doesn't worry me  
11 Not at all  
12  
13 **45. Choose the reply that is closest to how you have been feeling in the past week.**  
14 **Don't take too long over your replies: your immediate is best.**  
15  
16 **I can laugh and see the funny side of things:**  
17 As much as I always could  
18 Not quite so much now  
19 Definitely not so much now  
20 Not at all  
21  
22 **46. Choose the reply that is closest to how you have been feeling in the past week.**  
23 **Don't take too long over your replies: your immediate is best.**  
24  
25 **Worrying thoughts go through my mind:**  
26 A great deal of the time  
27 A lot of the time  
28 From time to time, but not too often  
29 Only occasionally  
30  
31 **47. Choose the reply that is closest to how you have been feeling in the past week.**  
32 **Don't take too long over your replies: your immediate is best.**  
33  
34 **I feel cheerful:**  
35 Not at all  
36 Not often  
37 Sometimes  
38 Most of the time  
39  
40 **48. Choose the reply that is closest to how you have been feeling in the past week.**  
41 **Don't take too long over your replies: your immediate is best.**  
42  
43 **I can sit at ease and feel relaxed:**  
44 Definitely  
45 Usually  
46 Not often  
47 Not at all

- 1  
2       **49. Choose the reply that is closest to how you have been feeling in the past week.**  
3       **Don't take too long over your replies: your immediate is best.**  
4  
5       **I feel as if I am slowed down:**  
6       Nearly all the time  
7       Very often  
8       Sometimes  
9       Not at all  
10  
11       **50. Choose the reply that is closest to how you have been feeling in the past week.**  
12       **Don't take too long over your replies: your immediate is best.**  
13  
14       **I get a sort of frightened feeling like 'butterflies' in the stomach:**  
15       Not at all  
16       Occasionally  
17       Quite often  
18       Very often  
19  
20       **51. Choose the reply that is closest to how you have been feeling in the past week.**  
21       **Don't take too long over your replies: your immediate is best.**  
22  
23       **I have lost interest in my appearance:**  
24       Definitely  
25       I don't take as much care as I should  
26       I may not take quite as much care  
27       I take just as much care as ever  
28  
29       **52. Choose the reply that is closest to how you have been feeling in the past week.**  
30       **Don't take too long over your replies: your immediate is best.**  
31  
32       **I feel restless as I have to be on the move:**  
33       Very much indeed  
34       Quite a lot  
35       Not very much  
36       Not at all  
37  
38       **53. Choose the reply that is closest to how you have been feeling in the past week.**  
39       **Don't take too long over your replies: your immediate is best.**  
40  
41       **I look forward with enjoyment to things:**  
42       As much as I ever did  
43       Rather less than I used to  
44       Definitely less than I used to  
45       Hardly at all  
46  
47



1           **54. Choose the reply that is closest to how you have been feeling in the past week.**  
2       **Don't take too long over your replies: your immediate is best.**

- 3  
4       **I get sudden feelings of panic:**  
5       Very often indeed  
6       Quite often  
7       Not very often  
8       Not at all

9  
10           **55. Choose the reply that is closest to how you have been feeling in the past week.**  
11       **Don't take too long over your replies: your immediate is best.**

- 12  
13       **I can enjoy a good book or radio or TV program:**  
14       Often  
15       Sometimes  
16       Not often  
17       Very seldom

18  
19  
20           **56. Thank you for filling out this questionnaire. Please complete last question to end.**  
21       **Please tell us, if you wish, how you have felt emotionally during the SARS-CoV-2**  
22       **pandemic? (please state in the text box below. If you choose not to answer, please**  
23       **write 'not applicable')**

24       Open box answer  
25  
26  
27

1 **Supplement 2: Original study protocol**

2 **Title:** An international survey of the impact of COVID19 on healthcare professionals carrying  
3 out ultrasonography, service provision and mental state in Obstetrics and Gynecology

4  
5 **Date:** 19<sup>th</sup> April 2020

6  
7 **Main Sponsor:** UZ Leuven Belgium

8 **Carried out in collaboration with:** International Society of Ultrasound in Obstetrics and  
9 Gynecology (ISUOG)

10 **Version number:** 1

11 Principal Investigators: Professor Tom Bourne and Professor Dirk Timmerman

12 Co-Investigators: Dr Christopher Kyriacou, Dr Harsha Shah

13 **Protocol to be assessed by:** EC Onderzoek UZ Leuven, Belgium.

14  
15 **Design:** Prospective cohort observational survey study.

16  
17 **Aim:** To assess the services and psychological impact of the COVID-19 pandemic to  
18 healthcare professionals carrying out ultrasonography within the Obstetrics and Gynecology  
19 specialty.

20  
21 **Hypothesis:**

- 22 1. Service provision to support healthcare professionals during the COVID-19 pandemic  
23 varies considerably in every unit globally;  
24 2. Healthcare professionals will have experienced COVID-19 first-hand;  
25 3. The COVID-19 pandemic has caused significant psychological distress to healthcare  
26 professionals which can be assessed using a validated psychological tool.

27  
28 **Outcome measures:**

- 29 1. A questionnaire to healthcare professionals detailing medical history, role, area of  
30 work, personal protective equipment (PPE), COVID-19 patient contact and personal  
31 COVID-19 experience will allow data to be collected in relation to the physical impact  
32 of the COVID-19 pandemic;  
33 2. Use of the validated Hospital Anxiety and Depression Scale (HADS) will allow  
34 psychological morbidity of healthcare professionals to be assessed.

35  
36 **Eligibility:** Members of ISUOG that fill in the questions via an online survey platform. The  
37 questionnaire will in English, Spanish, Greek, Hindu, Mandarin and Cantonese.

38  
39 **Duration:** The survey will be conducted over a period of two weeks in order to allow time  
40 for the questions to be answered, two reminder emails will be sent – one at a week before  
41 closure and one 24 hours before closure

42  
43 **Consent:** Consent will be implied when the questionnaire is filled in and there will be a  
44 specific question asking for consent to take part in the survey, however all information is  
45 anonymized and cannot be traced to an individual. No data will be requested that is in  
46 breach of General Data Protection Regulation (GDPR).

47

1 **Background:** The current coronavirus (SARS-CoV-2) pandemic carries a number of new  
2 challenges to local, national and international healthcare agencies in order to protect  
3 patients and healthcare professionals (physicians, sonographers, allied healthcare  
4 professionals). Guidance varies from nation to nation with issues arising from redeployment  
5 of clinicians, prioritization of particular services and provision of PPE. This is important as  
6 those carrying out ultrasound scans are in close proximity to patients and are at high risk of  
7 SARS-CoV-2 infection<sup>1</sup>.

8 Anxiety and depression are recognized complications for healthcare professionals working  
9 in a high-stress environment, particularly one that now encompasses a novel disease for  
10 which we have yet to fully understand<sup>2</sup>.

11  
12 **Methods:** This is a prospective cohort study and will recruit via the dissemination of a  
13 survey online through the ISUOG mailing list. Consent will be presumed when the form is  
14 filled in and submitted. This will allow healthcare professionals globally to answer. The  
15 questionnaire has been devised to assess the service provision in units around the world as  
16 well as question personal COVID-19 experience. Following on from this will be an optional  
17 HADS. The HADS is a 14-part questionnaire with 7 questions exploring symptoms of anxiety  
18 and depression, respectively. Each question is answered with a scale of 0-3 to represent  
19 severity of symptoms, with an independent maximum score of 21 for depression and  
20 anxiety. A score  $\geq 11$  is deemed moderate, whilst  $\geq 16$  represents severe symptoms<sup>3</sup>.

21  
22 **Statistics and data analysis:** Sample size will be dependent on the number of online  
23 responders. We hope that there will be significant uptake from a number of countries  
24 globally. The recruitment will be online so no breach to social distancing rules will apply. To  
25 compare differences in binary variables we will use the likelihood ratio, chi-squared or  
26 Fisher's exact test and will consider a p value  $< 0.05$  as statistically significant. Ninety-five per  
27 cent confidence intervals for rates of psychological morbidity will be created using the  
28 Wilson method.

29  
30 **Dissemination:** Following the collection and analysis of the data obtained from the  
31 questionnaire, we aim to present the findings to the ISUOG membership and publish in  
32 peer-reviewed journals – preferably *Ultrasound in Obstetrics and Gynecology*. The need to  
33 understand the experience of the pandemic by frontline workers is extremely important,  
34 not only to support them now, but to prepare for any future international healthcare  
35 emergency.

### 36 37 **References**

- 38 1. Abramowicz JS, Basseal JM, Brezinka C, Dall'Asta A, Deng J, Harrison G, Marsal K, Lee  
39 JCS, Lim A, Miloro P, Poon LC, Salvesen KJ, Sande R, ter Haar G, Westerway SC, Xie  
40 MX, Lees C. ISUOG Safety Committee Position Statement on use of personal  
41 protective equipment and hazard mitigation in relation to SARS-CoV-2 for  
42 practitioners undertaking obstetric and gynecological ultrasound. *ISUOG*. 2020  
43 March 28. Available from: [https://www.isuog.org/uploads/assets/b8dde768-08a2-  
44 424c-a4615551637515e9/ISUOG-Safety-Committee-statement-on-COVID19-and-  
45 PPE.pdf](https://www.isuog.org/uploads/assets/b8dde768-08a2-424c-a4615551637515e9/ISUOG-Safety-Committee-statement-on-COVID19-and-PPE.pdf)
- 46 2. Neto MLR, Almeida HG, Esmeraldo JD, Nobre CB, Pinheiro WR, de Oliveira CRT,  
47 Sousa IDC, Lima OMML, Lima NNR, Moreira MM, Lima CKT, Junior JG, da Silva CGL.

- 1           When health professionals look death in the eye: the mental health of professionals
- 2           who deal daily with the 2019 coronavirus outbreak. *Psychiatry Res.* 2020 April
- 3           13;288:112972. doi:10.1016/j.psychres.2020.112972.
- 4        3. Zigmond AS, Snaith RP. The hospital anxiety and depression scale. *Acta psychiatrica*
- 5           *scandinavica.* 1983 Jun;67(6):361-70.
- 6
- 7

1 **Supplement 3: Breakdown of healthcare professional (HCP) roles for analysis.**

| Job title                                      |                                                                     |
|------------------------------------------------|---------------------------------------------------------------------|
| Doctor in research – Gynecology                | Split up based on age: trainees/residents and consultants/attending |
| Doctor in research – Obstetrics                | Split up based on age: trainees/residents and consultants/attending |
| Doctor in research – Obstetrics and Gynecology | Split up based on age: trainees/residents and consultants/attending |
| Doctor in research – Radiology/Sonologist      | Split up based on age: trainees/residents and consultants/attending |
| Doctor in training – Gynecology                | Split up based on age: trainees/residents and consultants/attending |
| Doctor in training – Obstetrics                | Split up based on age: trainees/residents and consultants/attending |
| Doctor in training – Obstetrics and Gynecology | Split up based on age: trainees/residents and consultants/attending |
| Doctor in training – Radiologist/Sonologist    | Split up based on age: trainees/residents and consultants/attending |
| Gynecologist                                   | Split up based on age: trainees/residents and consultants/attending |
| Midwife – Early pregnancy only                 | Sonographer                                                         |
| Midwife – Obstetrics                           | Sonographer                                                         |
| Nurse – Early pregnancy only                   | Sonographer                                                         |
| Nurse – Gynecology                             | Sonographer                                                         |
| Nurse – Obstetrics                             | Sonographer                                                         |
| Nurse – Obstetrics and Gynecology              | Sonographer                                                         |
| Obstetrician                                   | Split up based on age: trainees/residents and consultants/attending |
| Obstetrician and Gynecologist                  | Split up based on age: trainees/residents and consultants/attending |
| Radiologist/Sonologist                         | Split up based on age: trainees/residents and consultants/attending |
| Retired                                        | Exclude from analyses                                               |
| Sonographer – Gynecology                       | Sonographer                                                         |
| Sonographer – Obstetrics                       | Sonographer                                                         |
| Sonographer – Obstetrics and Gynecology        | Sonographer                                                         |

2

3

**1 Supplement 4: Breakdown of risk by area of work for analysis.**

| Areas of work                                           | Risk of COVID-19 infection |
|---------------------------------------------------------|----------------------------|
| Early pregnancy unit - Ultrasound and assessment        | High risk                  |
| Gynecology - Acute Gynecology                           | High risk                  |
| Gynecology - Benign Gynecology                          | Low risk                   |
| Gynecology – Oncology                                   | Low risk                   |
| Gynecology - Ultrasound                                 | High risk                  |
| Obstetrics/Gynecology/Radiology - From home             | Low risk                   |
| Obstetrics - Antenatal clinic                           | Moderate risk              |
| Obstetrics - Antenatal ward                             | Moderate risk              |
| Obstetrics - Birth center/Birthing center               | High risk                  |
| Obstetrics - Community clinics                          | Moderate risk              |
| Obstetrics - Labor ward                                 | High risk                  |
| Obstetrics - Maternity helplines                        | Low risk                   |
| Obstetrics - Maternity triage/Hospital obstetric triage | High risk                  |
| Obstetrics - Postnatal ward                             | Moderate risk              |
| Obstetrics – Ultrasound                                 | High risk                  |
| Radiology - non-Ultrasound                              | Moderate risk              |
| Radiology - Ultrasound                                  | High risk                  |

2

3

1 **Supplement 5: Flowchart summarizing survey participants, differentiating International**  
2 **Society of Ultrasound in Obstetrics and Gynecology (ISUOG) members and non-ISUOG**  
3 **members (n = 3287).**

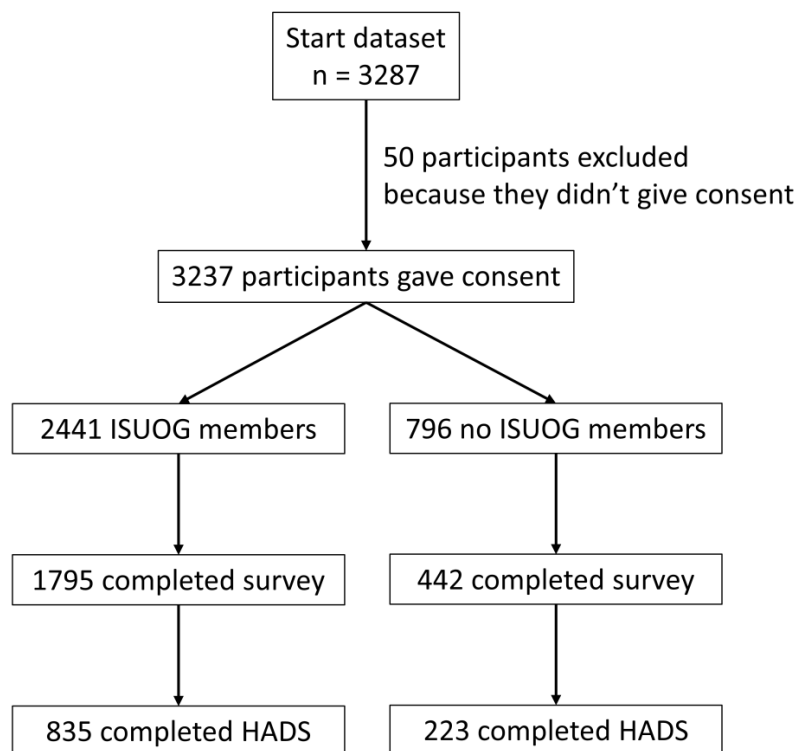

4  
5  
6  
7  
8  
9  
10  
11

Response rate:

ISUOG members - 23.1% (2441/10589)

Non-ISUOG members - 3.2% (796/24920).

Abbreviations: HADS (Hospital Anxiety and Depression scale)

1 **Supplement 6: Demographics of survey participation, differentiated based on**  
 2 **International Society of Ultrasound in Obstetrics and Gynecology (ISUOG) membership (n**  
 3 **= 3237).**

|                                                                                           | ISUOG members (n = 2441) | Others (n = 796) |
|-------------------------------------------------------------------------------------------|--------------------------|------------------|
| <b>Total ISUOG mailing list (n)</b>                                                       | 10589                    | 24920            |
| <b>Response of total ISUOG mailing list (n, %)</b>                                        | 2441 (23%)               | 796 (3%)         |
| Countries (n)                                                                             | 120                      | 78               |
| Number of respondents in English (n)                                                      | 1603                     | 357              |
| Number of respondents in Spanish (n)                                                      | 564                      | 317              |
| Number of respondents in Italian (n)                                                      | 195                      | 72               |
| Number of respondents in French (n)                                                       | 79                       | 50               |
| <b>Completed survey</b>                                                                   | <b>1795</b>              | <b>442</b>       |
| <b>Countries (n)</b>                                                                      | 110                      | 65               |
| <b>Age (mean, range)</b>                                                                  | 47.2 (18-82)             | 47.7 (25-78)     |
| ≤20 years                                                                                 | 1 (0%)                   | 0 (0%)           |
| 21-30 years                                                                               | 95 (5%)                  | 22 (5%)          |
| 31-40 years                                                                               | 454 (25%)                | 104 (24%)        |
| 41-50 years                                                                               | 549 (31%)                | 137 (31%)        |
| 51-60 years                                                                               | 475 (26%)                | 121 (28%)        |
| 61-70 years                                                                               | 201 (11%)                | 50 (11%)         |
| >70 years                                                                                 | 18 (1%)                  | 6 (1%)           |
| <b>Gender (n, %)</b>                                                                      |                          |                  |
| Female                                                                                    | 1176 (66%)               | 298 (68%)        |
| Male                                                                                      | 613 (34%)                | 142 (32%)        |
| Intersex                                                                                  | 1 (0%)                   | 0 (0%)           |
| Prefer not to say                                                                         | 3 (0%)                   | 0 (0%)           |
| <b>Prevalence suspected or confirmed SARS-CoV-2 based on symptoms +/- PCR testing (%)</b> | 230 (13%)                | 60 (14%)         |
| <b>Is PPE used by respondents (n, %)</b>                                                  |                          |                  |
| Not yet                                                                                   | 217 (12%)                | 62 (14%)         |
| Yes - for aerosol generating procedures only                                              | 110 (6%)                 | 23 (5%)          |
| Yes - for all patients                                                                    | 1142 (64%)               | 250 (57%)        |
| Yes - for suspected/positive patients only                                                | 324 (18%)                | 105 (24%)        |
| <b>What PPE is used by respondents (n, %)</b>                                             |                          |                  |
| None                                                                                      | 59 (3%)                  | 17 (4%)          |
| Gloves only                                                                               | 38 (2%)                  | 11 (3%)          |
| Gloves + surgical mask                                                                    | 393 (22%)                | 104 (24%)        |
| Gloves + surgical mask + visor                                                            | 116 (6%)                 | 36 (8%)          |
| Gloves + FFP3 mask                                                                        | 83 (5%)                  | 12 (3%)          |
| Gloves + FFP3 mask + visor                                                                | 39 (2%)                  | 12 (3%)          |
| Gloves + FFP3 mask + visor + gown + surgical hat                                          | 70 (4%)                  | 20 (5%)          |



|                                                             |               |               |
|-------------------------------------------------------------|---------------|---------------|
| <i>Patient wearing mask</i>                                 | 1482 (83%)    | 359 (82%)     |
| <b>Concerns regarding a lack of PPE (n, %)</b>              |               |               |
| <i>No</i>                                                   | 475 (26%)     | 104 (24%)     |
| <i>Gloves</i>                                               | 223 (12%)     | 55 (13%)      |
| <i>Gown</i>                                                 | 499 (28%)     | 130 (30%)     |
| <i>N95/FFP3 mask</i>                                        | 1014 (57%)    | 265 (60%)     |
| <i>Surgical hat</i>                                         | 187 (10%)     | 46 (10%)      |
| <i>Surgical mask</i>                                        | 657 (37%)     | 163 (37%)     |
| <i>Visor</i>                                                | 458 (26%)     | 124 (28%)     |
| <i>Surgical mask (patient)</i>                              | 479 (27%)     | 130 (30%)     |
| <b>Type of PPE that has been re-used or recycled (n, %)</b> |               |               |
| <i>No</i>                                                   | 690 (38%)     | 175 (40%)     |
| <i>Gloves</i>                                               | 27 (2%)       | 7 (2%)        |
| <i>Gown</i>                                                 | 229 (13%)     | 58 (13%)      |
| <i>N95/FFP3 mask</i>                                        | 722 (40%)     | 164 (37%)     |
| <i>Surgical hat</i>                                         | 74 (4%)       | 18 (4%)       |
| <i>Surgical mask</i>                                        | 435 (24%)     | 130 (30%)     |
| <i>Visor</i>                                                | 493 (27%)     | 128 (29%)     |
| <b>Anxiety (mean, 95% CI)*</b>                              | 7 (6.7-7.3)   | 6.6 (6.1-7.1) |
| <i>0-7 (none)</i>                                           | 480 (57%)     | 140 (63%)     |
| <i>8-10 (mild)</i>                                          | 180 (22%)     | 49 (22%)      |
| <i>11-21 (moderate to severe)</i>                           | 175 (21%)     | 34 (15%)      |
| <b>Depression (mean, 95% CI)*</b>                           | 5.4 (5.2-5.7) | 4.9 (4.4-5.4) |
| <i>0-7 (none)</i>                                           | 587 (70%)     | 173 (78%)     |
| <i>8-10 (mild)</i>                                          | 171 (20%)     | 34 (15%)      |
| <i>11-21 (moderate to severe)</i>                           | 77 (9%)       | 16 (7%)       |

1 \*Numbers of HADS respondents lower than for main survey (n = 835 ISUOG members, n = 223 Others)

2 Abbreviations: PCR (Polymerase Chain Reaction); PPE (Personal Protective Equipment)

3

1 **Supplement 7: Comparison of comorbidity in those with (n = 290) and without suspected**  
2 **or confirmed SARS-CoV-2 (n = 1947) (Total n = 2237).**

|                                 | <b>Suspected or confirmed SARS-CoV-2</b> | <b>Without suspected or confirmed SARS-CoV-2</b> |
|---------------------------------|------------------------------------------|--------------------------------------------------|
| Heart disease (n, %)            | 3 (1%)                                   | 43 (2%)                                          |
| Lung disease (n %)              | 30 (10%)                                 | 160 (8%)                                         |
| Use of antihypertensives (n, %) | 39 (13%)                                 | 283 (15%)                                        |
| Smokers (n, %)                  | 13 (4%)                                  | 125 (6%)                                         |

3

4

1 **Supplement 8: Comparison of Hospital Anxiety and Depression scale (HADS) scores in**  
2 **those with (n = 162) and without suspected or confirmed SARS-CoV-2 (n = 896) (Total n =**  
3 **1058).**

|                                     | <b>Suspected or confirmed SARS-CoV-2</b> | <b>Without suspected or confirmed SARS-CoV-2</b> |
|-------------------------------------|------------------------------------------|--------------------------------------------------|
| Anxiety (mean, 95% CI)              | 7.4 (6.7-8.0)                            | 6.8 (6.6-7.1)                                    |
| 0-7 ( <i>none</i> )                 | 86 (53%)                                 | 534 (60%)                                        |
| 8-10 ( <i>mild</i> )                | 32 (20%)                                 | 197 (22%)                                        |
| 11-21 ( <i>moderate to severe</i> ) | 44 (27%)                                 | 165 (18%)                                        |
| Depression (mean, 95% CI)           | 5.8 (5.2-6.4)                            | 5.2 (5.0-5.5)                                    |
| 0-7 ( <i>none</i> )                 | 105 (65%)                                | 655 (73%)                                        |
| 8-10 ( <i>mild</i> )                | 37 (23%)                                 | 168 (19%)                                        |
| 11-21 ( <i>moderate to severe</i> ) | 20 (12%)                                 | 73 (8%)                                          |

4

5

1 **Supplement 9: Hospital Anxiety and Depression scale (HADS) breakdown by gender (n =**  
 2 **1058).**

|                                          | Female        | Male          | Prefer not to say |
|------------------------------------------|---------------|---------------|-------------------|
| <b>Number of respondents (n, %)</b>      | 754 (71%)     | 303 (29%)     | 1 (0%)            |
| <b>Anxiety (mean, 95% CI)*</b>           | 6.9 (6.6-7.2) | 5.7 (5.3-6.2) | -                 |
| <i>0-7 (None) (n, %)</i>                 | 450 (60%)     | 202 (67%)     | 1 (100%)          |
| <i>8-10 (Mild) (n, %)</i>                | 148 (20%)     | 60 (20%)      | 0 (0%)            |
| <i>11-21 (Moderate to severe) (n, %)</i> | 156 (21%)     | 41 (14%)      | 0 (0%)            |
| <b>Depression (mean, 95% CI)*</b>        | 5.4 (5.2-5.7) | 5.0 (4.6-5.4) | -                 |
| <i>0-7 (none) (n, %)</i>                 | 529 (70%)     | 230 (76%)     | 1 (100%)          |
| <i>8-10 (mild) (n, %)</i>                | 146 (19%)     | 59 (19%)      | 0 (0%)            |
| <i>11-21 (moderate to severe) (n, %)</i> | 79 (10%)      | 14 (5%)       | 0 (0%)            |

3

1 **Supplement 10: Hospital Anxiety and Depression scale (HADS) breakdown by risk of**  
 2 **working area (n = 1058).**

|                                          | Low risk       | Moderate risk | High risk     |
|------------------------------------------|----------------|---------------|---------------|
| <b>Number of respondents (n, %)</b>      | 23 (2%)        | 28 (3%)       | 1007 (95%)    |
| <b>Anxiety (mean, 95% CI)*</b>           | 8.3 (6.3-10.3) | 5.1 (3.6-6.6) | 6.6 (6.3-6.8) |
| <i>0-7 (None) (n, %)</i>                 | 13 (57%)       | 21 (75%)      | 619 (61%)     |
| <i>8-10 (Mild) (n, %)</i>                | 3 (13%)        | 3 (11%)       | 202 (20%)     |
| <i>11-21 (Moderate to severe) (n, %)</i> | 7 (30%)        | 4 (14%)       | 186 (18%)     |
| <b>Depression (mean, 95% CI)*</b>        | 8.2 (6.0-10.3) | 4.3 (2.7-5.8) | 5.3 (5.0-5.5) |
| <i>0-7 (none) (n, %)</i>                 | 12 (52%)       | 19 (68%)      | 729 (72%)     |
| <i>8-10 (mild) (n, %)</i>                | 4 (17%)        | 6 (21%)       | 195 (19%)     |
| <i>11-21 (moderate to severe) (n, %)</i> | 7 (30%)        | 3 (11%)       | 83 (8%)       |

3

1 **Supplement 11: Comparison of Hospital Anxiety and Depression scale (HADS) scores in**  
 2 **those with (n = 788) and without personal protective equipment (PPE) shortages (n = 270)**  
 3 **(Total n = 1058).**

|                                     | <b>PPE shortages</b> | <b>No PPE shortages</b> |
|-------------------------------------|----------------------|-------------------------|
| Anxiety (mean, 95% CI)              | 7.4 (7.1-7.7)        | 5.5 (5.0-6.0)           |
| 0-7 ( <i>none</i> )                 | 430 (55%)            | 190 (70%)               |
| 8-10 ( <i>mild</i> )                | 183 (23%)            | 46 (17%)                |
| 11-21 ( <i>moderate to severe</i> ) | 175 (22%)            | 34 (13%)                |
| Depression (mean, 95% CI)           | 5.7 (5.5-6.0)        | 4.1 (3.7-4.5)           |
| 0-7 ( <i>none</i> )                 | 540 (69%)            | 220 (81%)               |
| 8-10 ( <i>mild</i> )                | 167 (21%)            | 38 (14%)                |
| 11-21 ( <i>moderate to severe</i> ) | 81 (10%)             | 12 (4%)                 |

4
